# Supplementary material for: A 3D model to evaluate cell chemotaxis within a heterogenic tumor microenvironment
Source: Royal Society of Chemistry journal article supplement (doi:10.1039/d5lc00763a), 2026-01-01
Supplement: d5lc00763a1.pdf [file d5lc00763a1.pdf]

## Supplementary Information

### A 3D model to evaluate cell chemotaxis within a heterogenic tumor microenvironment

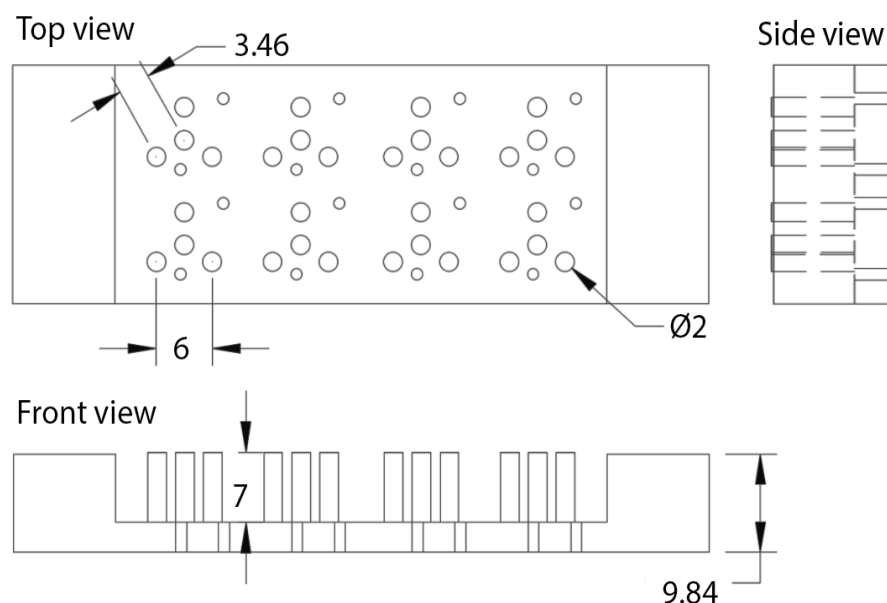

**Figure S1: Computer-aided design of chemotaxis chamber master mold.** 2-D view of top, side and front view of the master mold used to imprint the hydrogel chemotaxis chambers. Dimensions are in mm.

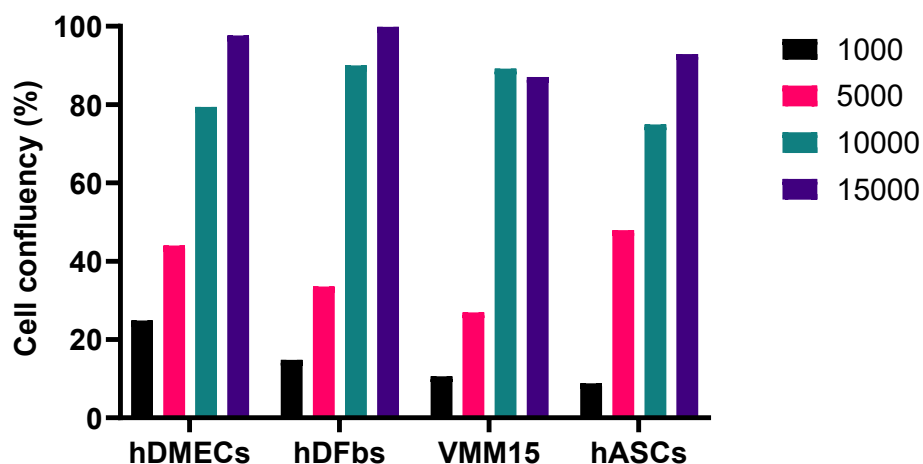

**Figure S2: Evaluation of cell confluency.** Cell confluency of hDMECs, hDFbs, VMM15 and hASCs 2h after seeding at densities of 1000, 5000, 10000 and 15000 per chamber well.

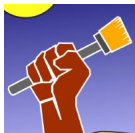

## 1. Image Classification and Segmentation (Ilastik)

Original image  
1538x 1118 (Pixels)

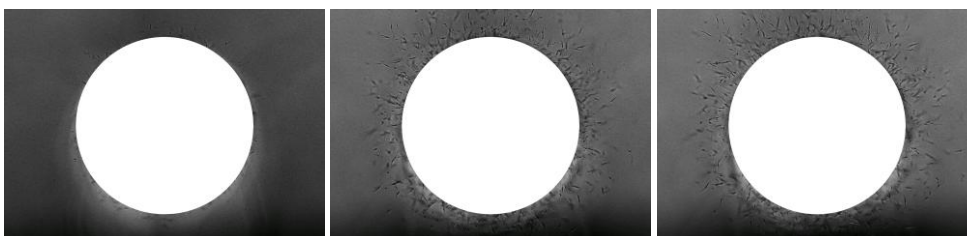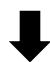

Pixel Classification with Ilastik

Classifier Training: Label 1 (Yellow) – Cells  
Label 2 (Blue) - Hydrogels

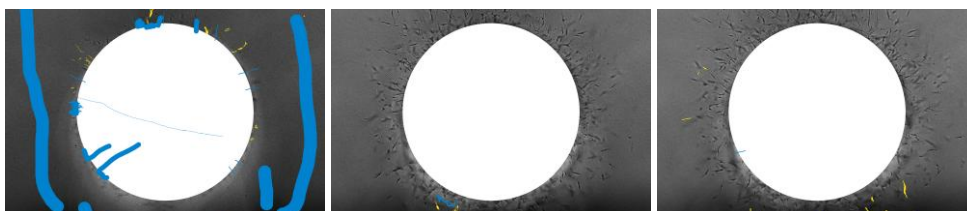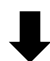

Probability Maps

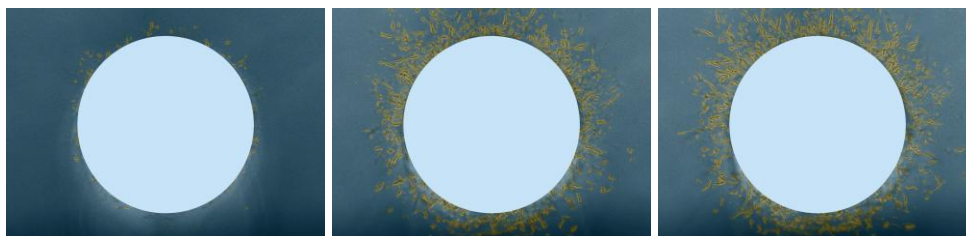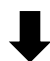

Simple Segmentation

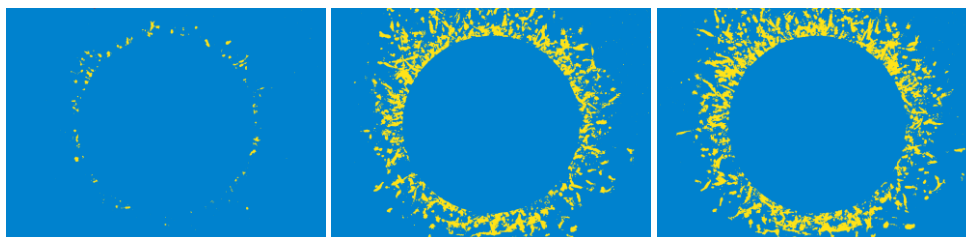

## 2. Workflow for GIMP, ImageMagick, Ilastik and CellProfiler

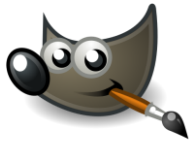

Step 1: In GIMP draw a circle that matches the border of the well and register the position as in (x,y) coordinates

Original image  
1596x 1433 (Pixels)

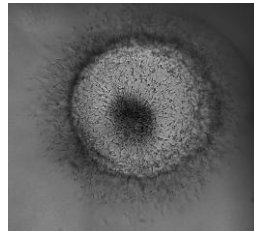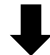

Mask

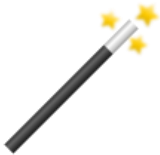

Step 2: In Imagemagick create a circular mask from the (x,y) coordinates obtained in GIMP.

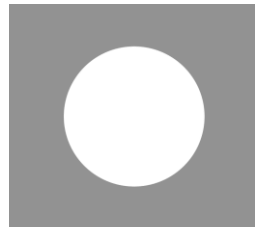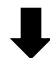

```
draw circle\\ magick convert -size 1500x1400 xc:none -fill white -draw "circle 804,724 824,1094" mask.png
combine mask and image\\ FOR %i IN (*.tif) DO magick composite mask.png %i -matte %i
```

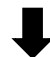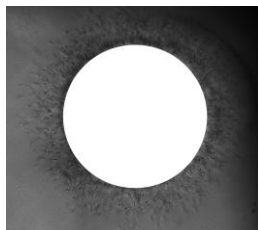

```
crop image to remove white\\ FOR %i IN (*.tif) DO magick convert %i -crop 1600x1496 %i
```

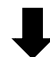

Step 2: A crop to divide the image in 4 equal parts is needed. The idea is that the white part of the image (originally the well) should be exactly in the middle of the image and equally distant from the borders)

```
crop image for 4 parts\\ FOR %i IN (*.tif) DO magick convert %i -crop 1538x1142+0+354 %i
```

```
remove second layer of tif file (detrimental for ilastik)\\ FOR %i IN (*.tif) DO magick convert %i[0] %i
```

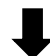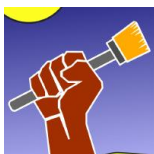

Step 2: In Ilastik run the previously trained pixel classifier.

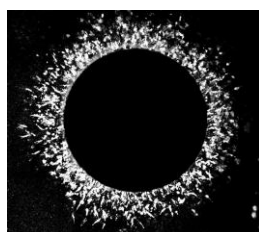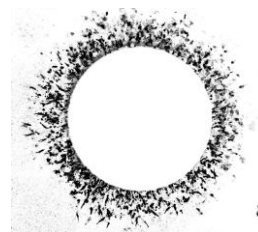

Probability map for Class 0      Probability map for Class 1

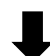

Step 1: Now it is required to divide each image in four quadrants of equal size. In this exemple the image here displayed has a width of 1538 and a hieght of 1118. To get 4 quadrants we need to obtain 4 parts of  $(11538/2$  and  $118/2)$  769 width and 559 hieght.

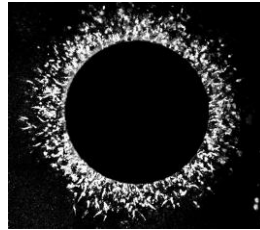

divide images in 4 quadrants\\ FOR %i IN (\*.tif) DO magick convert %i -crop 769x559 %i-part%d.tif

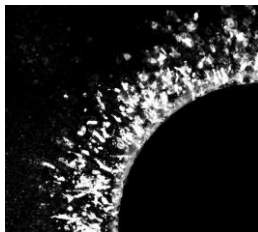

part0

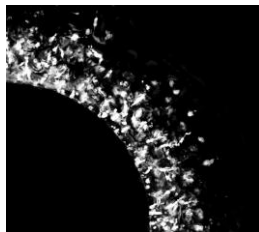

part1

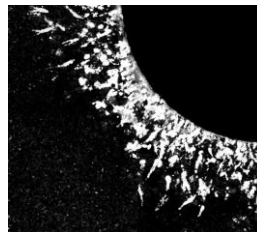

part2

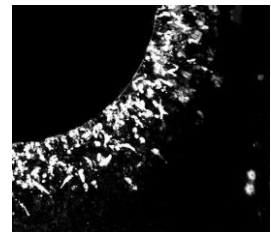

part3

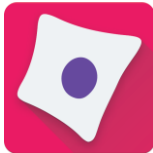

Load Images in CellProfiler

Identify Primary Objects  
Thresholding strategy: Global  
Thresholding method: Manual  
Manual Threshold: 0.5

Measure Image Area Occupied

Display Data on Image

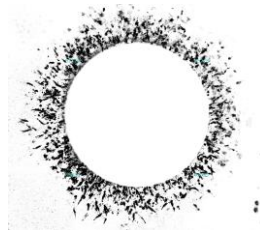

Export to Spreadsheet
